# Supplementary material
Source: PubMed Central journal article supplement (PMC4724940)
Supplement: NIHMS66430-supplement-01.pdf [file NIHMS66430-supplement-01.pdf]

# Supplementary Figure 1: Uncropped scans of Western blot gels

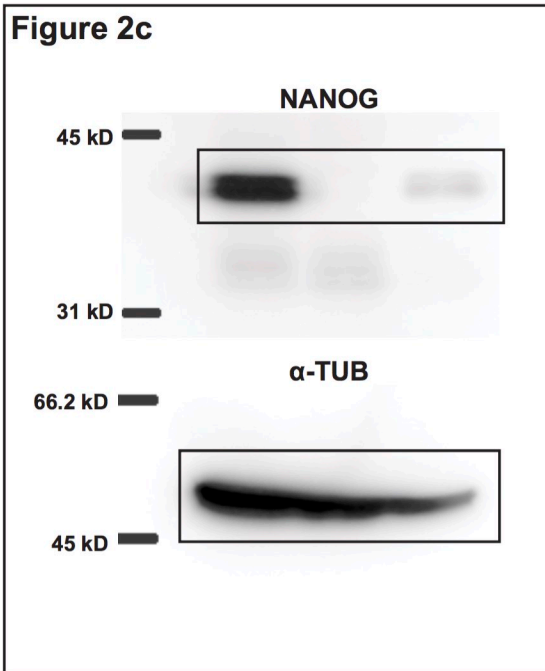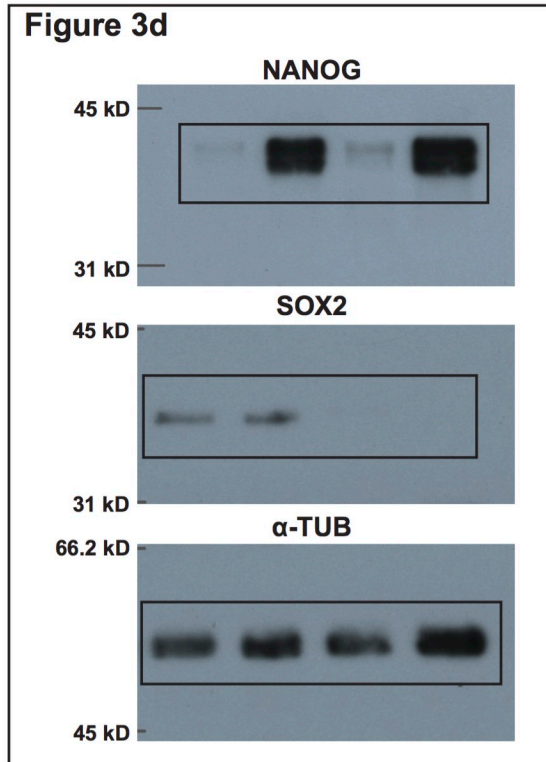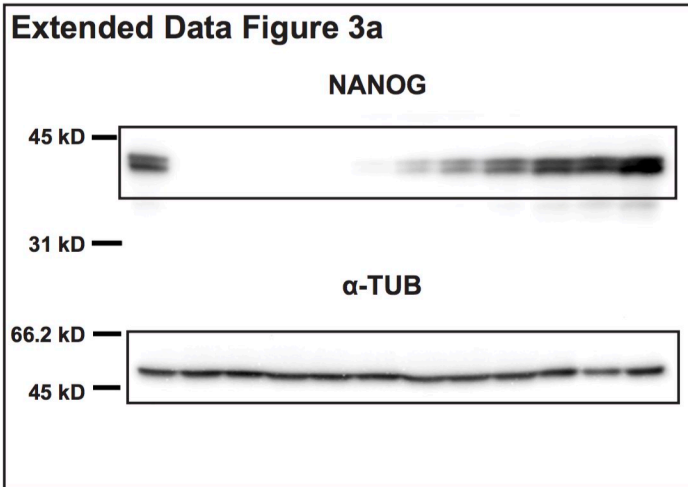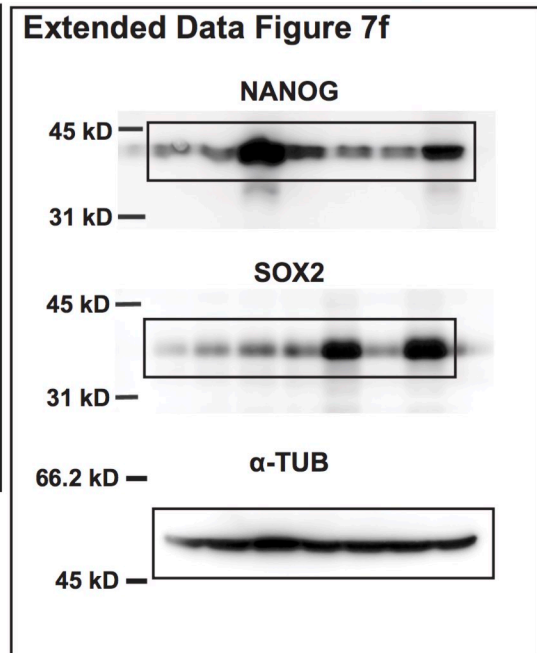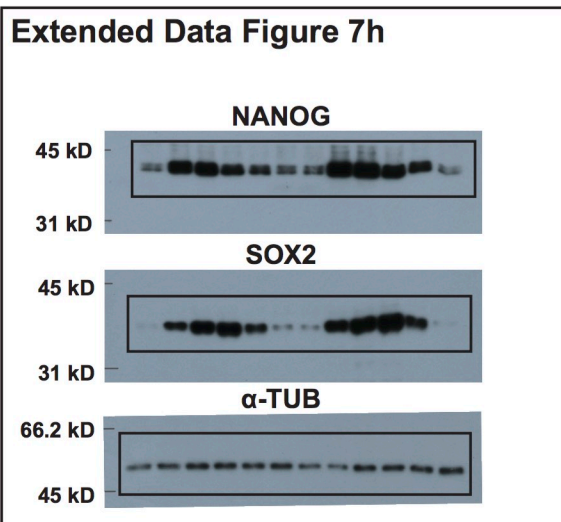

## Supplementary Table 1: Oligonucleotide sequences

### Gene-specific primers for qRT-PCR

| Gene            | Forward                    | Reverse                  |
|-----------------|----------------------------|--------------------------|
| Gapdh 3'UTR     | CCCCAACACTGAGCATCTCC       | ATTATGGGGGTCTGGGATGG     |
| Arbp coding     | CAAAGCTGAAGCAAAGGAAGAG     | AATTAAGCAGGCTGACTTGGTTG  |
| Piap coding     | TTACCCATCAAACCATTCTTCTG    | AACCCAAAGAACTTCAGTGAGAGC |
| Oct4 coding     | CCAATCAGCTTGGGCTAGAG       | CTGGGAAAGGTGTCCCTGTA     |
| Sox2 coding     | ACCAGCTCGCAGACCTACAT       | TGGAGTGGGAGGAAGAGGTA     |
| Nanog coding    | ACCTGAGCTATAAGCAGGTTAAGAC  | GTGCTGAGCCCTTCTGAATCAGAC |
| Klf4 3'UTR      | GGGGTCTGATACTGGATGGA       | CCCCCAAGCTCACTGATTTA     |
| Prdm1 coding    | GAGGATCTGACCCGAATCAA       | CATGGAGGTCACATCGACAC     |
| Prdm1 3'UTR     | AGCATGACCTGACATTGACACC     | CTCAACACTCTCATGTAAGAGGC  |
| Prdm14 coding   | GCCTGAACAAGCACATGAGA       | TGCACTTGAAGGGCTTCTCT     |
| Prdm14 3'UTR    | ACAGCCAAGCAATTTGCACTAC     | TTACCTGGCATTTCATTGCTC    |
| Tfap2c coding   | ATCAAGATCGGACACCCAAC       | ATGGCGATTAGAGCCTCCTT     |
| Tfap2c 3'UTR    | TGAAGATGAAGCTGGGCTTT       | TCCATTCTCTTCCGGTTCAG     |
| Dppa3 coding    | AGGCTCGAAGGAAATGAGTTTG     | TCCTAATTCTTCCCGATTTTCG   |
| Nanos3 coding   | CACTACGGCCTAGGAGCTTGG      | TGATCGCTGACAAGACTGTGG    |
| Mvh 3'UTR       | CAGTTTGCAATGTGAGCTTTG      | GGGGGAAATGTGTTTCATCTT    |
| Wnt3 coding     | CAAGCACACAATGAAGCAGGC      | TCGGGACTCACGGTGTTCCTC    |
| Brachyury 3'UTR | ATCAGAGTCCTTTGCTAGGTAG     | GTTACAATCTTCTGGCTATGC    |
| Dnmt3a 3'UTR    | GACTCGCGTGCAATAACCTTAG     | GGTCACTTCCCTCACTCTGG     |
| Dnmt3b coding   | CTCGCAAGGTGTGGGCTTTTGTAAC  | CTGGGCATCTGTCATCTTTGCACC |
| Hoxa1 3'UTR     | GTGACTAGTCTTCTGCATGTCG     | TCTGCTCTGGACCACATCACTC   |
| Hoxb1 3'UTR     | GATCCTACAGGTCTTGGGACC      | AGCTCAAAGGCACTGAACTGAG   |
| Sox1 3'UTR      | CCTGTGGTTCTGCCTTTTGC       | TGAGCACAAACCATCCTCCT     |
| Sox7 3'UTR      | CCACAGTCCTTTGGCTGTCC       | TACACGTGTCCAAGGGCAGA     |
| Sox17 3'UTR     | TTCTGTACACTTTAATGAGGCTGTTC | TTGTGGGAAGTGGGATCAAG     |

### gRNA sequences for Nanog knockout

| Target      | Top                      | Bottom                     |
|-------------|--------------------------|----------------------------|
| Nanog exon1 | CACCGTTCTCGGGATGAAAACTGC | AAACGCAGTTTTTTCATCCCGAGAAC |

### Primers for chromatin immunoprecipitation

| Amplified region | Forward              | Reverse              |
|------------------|----------------------|----------------------|
| Negative control | AGGAGACCAGAGAGGCAAGA | GTCTTGAGGCCAGAAACCTC |
| Prdm1 enhancer   | GCATCAGGAGATTGCCCTT  | GCTGTGTGAGGTCCTCTGTG |
| Prdm14 enhancer  | TCAAAGAAAGGGGTGAGCTT | TCAAAGAAAGGGGTGAGCTT |

### Primers for cloning of putative enhancers

| Putative enhancer | Top                       | Bottom                    |
|-------------------|---------------------------|---------------------------|
| Prdm1             | GAGGATCAGGAGTTCAAGTTGGCTA | GGGGCAAACAGGTGAGTTTATTATT |
| Prdm14            | CCCTCACACACACTACACCC      | AGCAACTGGAAGACTGAGGC      |
